# Supplementary material for: Impact of α‐synuclein spreading on the nigrostriatal dopaminergic pathway depends on the onset of the pathology
Source: PubMed Central journal article supplement — Brain Pathol. 2021 Nov 21;32(2):e13036. doi: 10.1111/bpa.13036 (PMC8877754; doi:10.1111/bpa.13036), 2021-11-21
Supplement: BPA-32-e13036-s003.pdf [file BPA-32-e13036-s003.pdf]

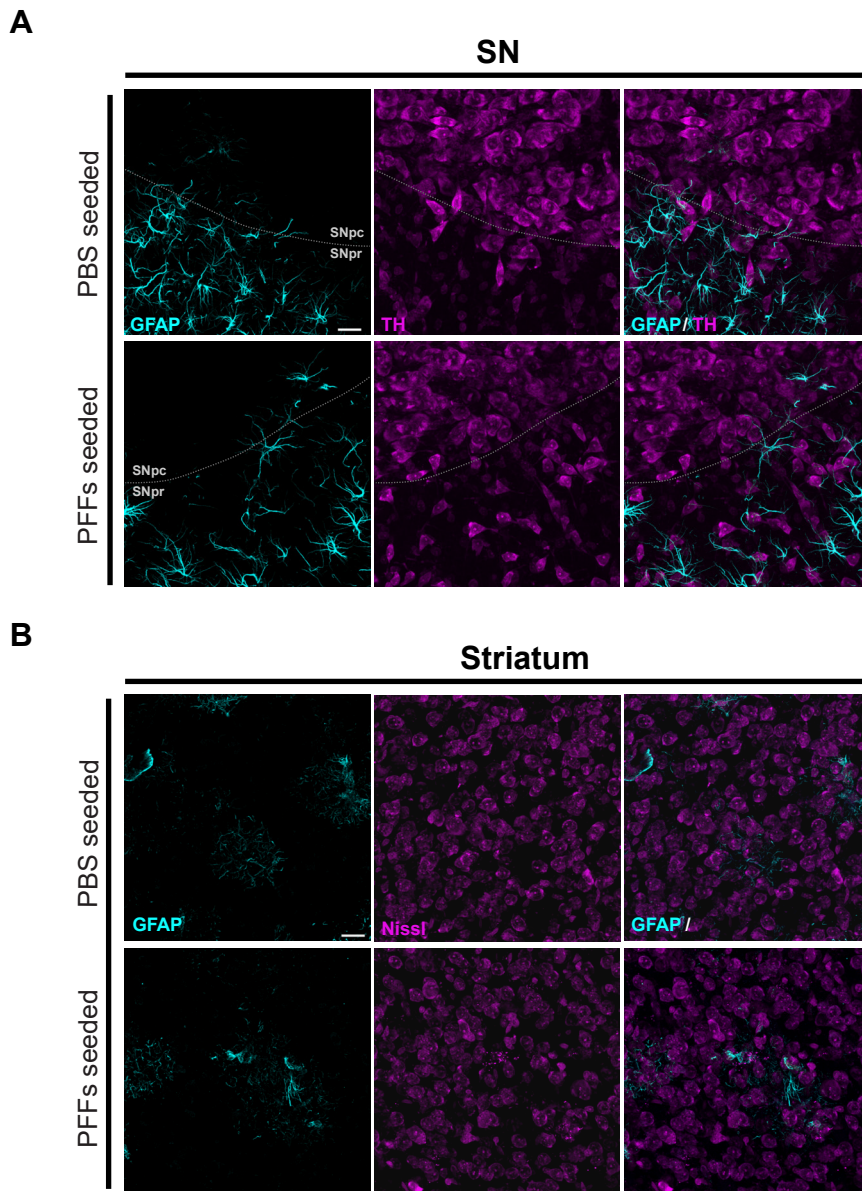

**Figure S5. No sign of evident astrogliosis along nigrostriatal pathway in mice 2 months after PFFs hemilateral injection.** Representative confocal acquisition of SNpc (A, average of stack image from volume of 212.34 x 212.34 x 43  $\mu\text{m}$ ) and striatum (B, 212.34 x 212.34 x 49  $\mu\text{m}$ ) from 5-month-old mouse showing GFAP (in Ceylon blue), Tyrosine Hydroxylase (TH) and Nissl (in magenta) immunoreactivity, 2 m.p.i.. In both area, astrocytes express very low level of GFAP protein, comparably in both seeded and not seeded area. Scale bars 20  $\mu\text{m}$ .
