# Supplementary material for: Impact of α‐synuclein spreading on the nigrostriatal dopaminergic pathway depends on the onset of the pathology
Source: PubMed Central journal article supplement — Brain Pathol. 2021 Nov 21;32(2):e13036. doi: 10.1111/bpa.13036 (PMC8877754; doi:10.1111/bpa.13036), 2021-11-21
Supplement: BPA-32-e13036-s004.pdf [file BPA-32-e13036-s004.pdf]

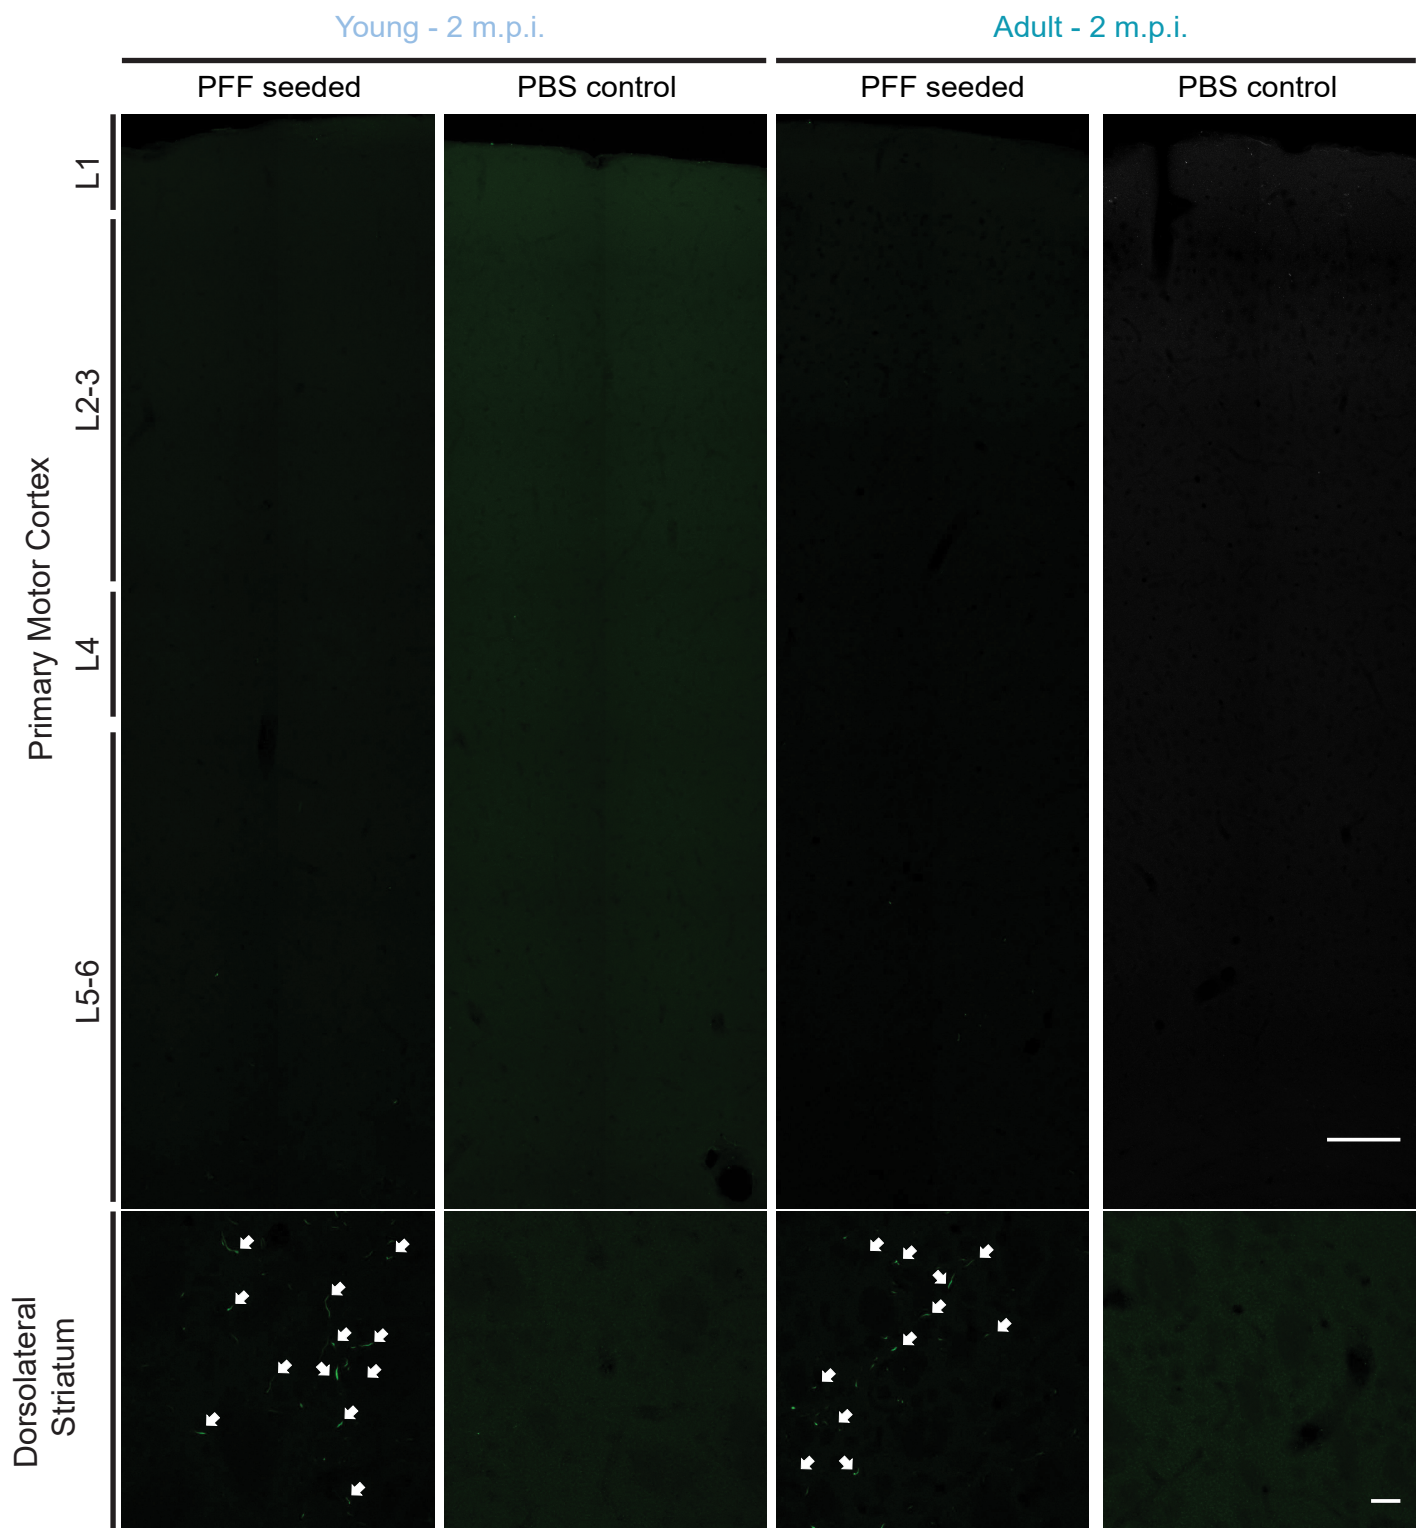

**Figure S2. Spreading of alpha-synuclein from the SNpc did not reach the motor cortex 2 months after PFFs inoculation.** Phospho- $\alpha$ -synuclein (pSyn) staining in primary motor cortex and striatum acquired from the same coronal slice in young and adult mice, 2 m.p.i.. Immunoreactivity of pSyn-positive aggregates was observed only in the striatum ipsilateral to the PFFs injection. This observation validates our experimental design that use the contralateral hemisphere as internal control. Scalebar 50  $\mu$ m.
