# Supplementary material for: Impact of α‐synuclein spreading on the nigrostriatal dopaminergic pathway depends on the onset of the pathology
Source: PubMed Central journal article supplement — Brain Pathol. 2021 Nov 21;32(2):e13036. doi: 10.1111/bpa.13036 (PMC8877754; doi:10.1111/bpa.13036), 2021-11-21
Supplement: BPA-32-e13036-s005.pdf [file BPA-32-e13036-s005.pdf]

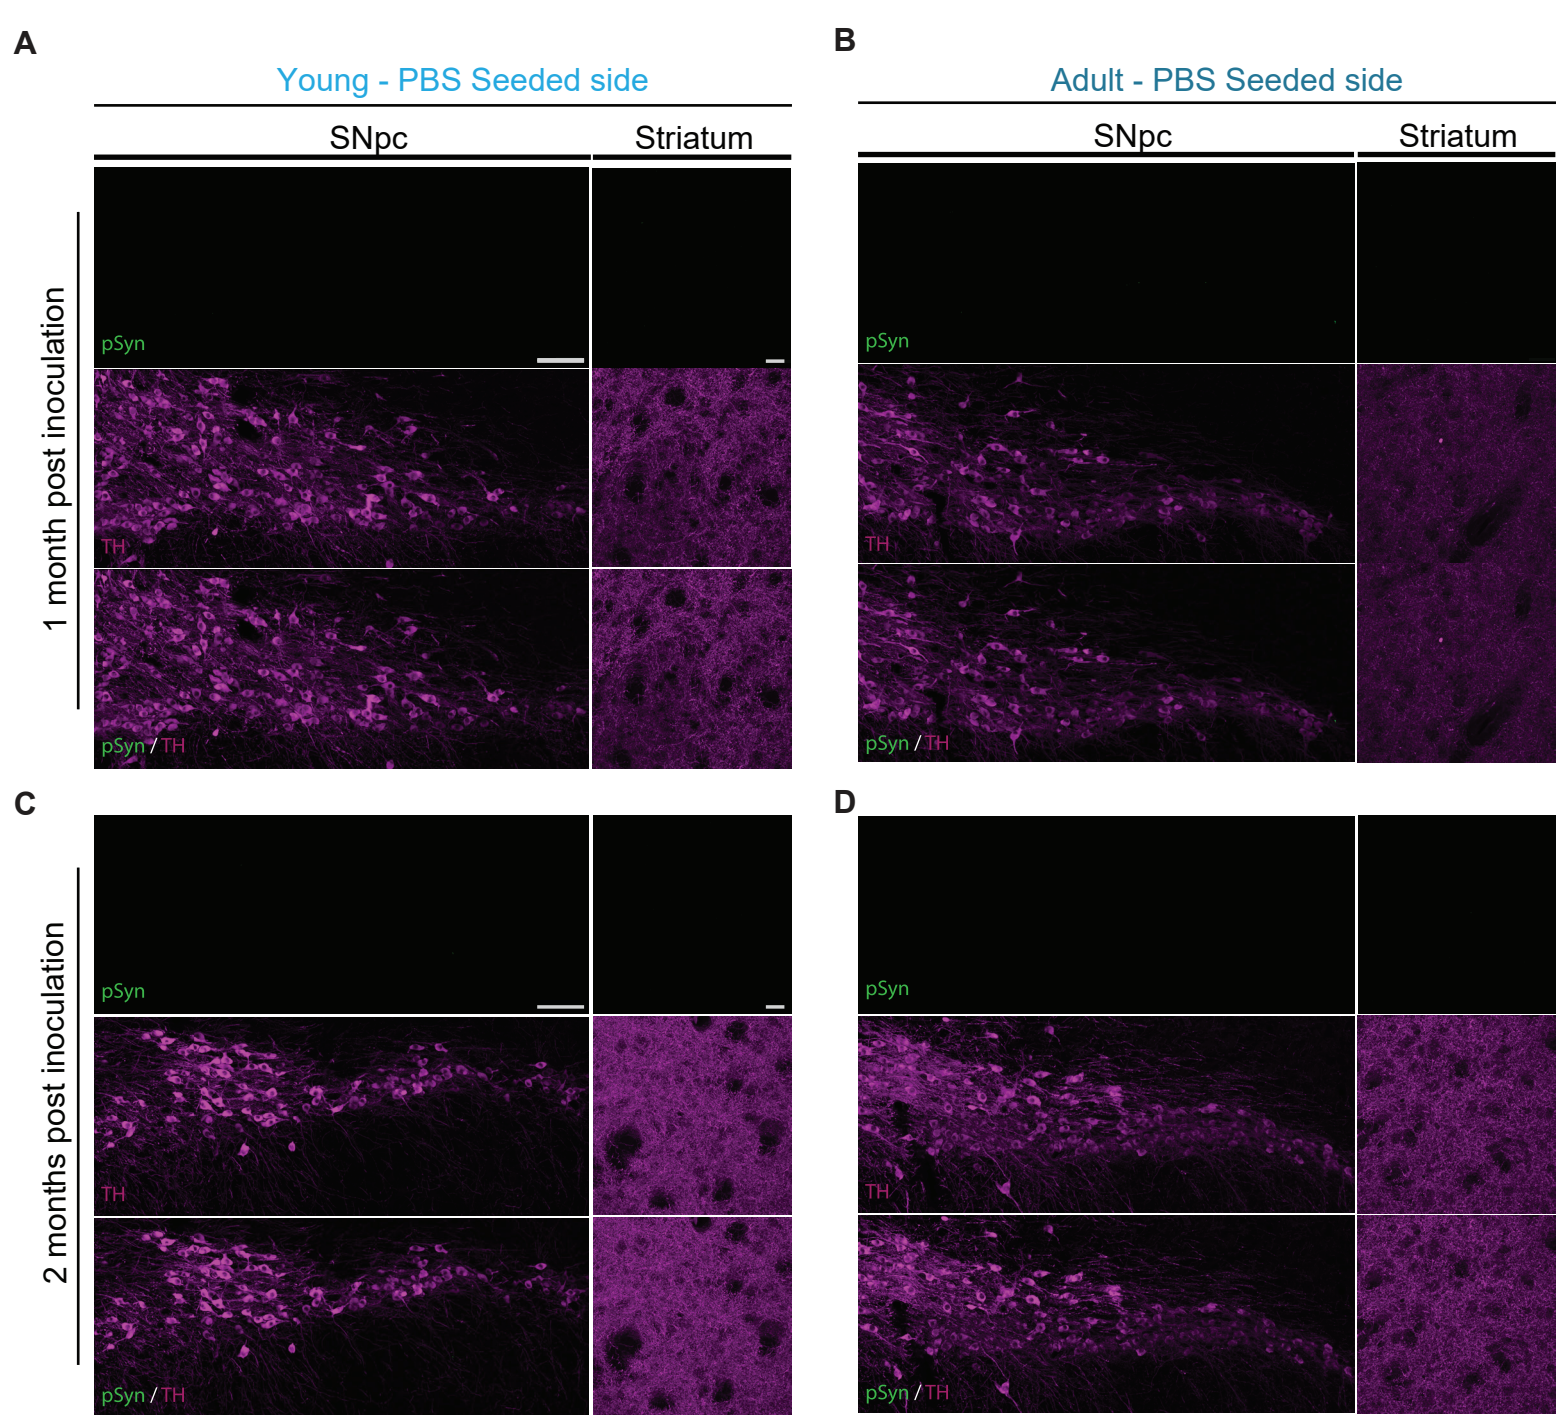

**Figure S1. Representative images of immunohistochemistry staining in PBS-injected SNpc and striatum of young and adult mice.** Confocal acquisition of tile scanned SNpc reconstruction (left, scale bar: 100  $\mu$ m) and dorsolateral striatum (right, scale bars 20  $\mu$ m) coronal area sections, Contralateral to the images showed in figure 2. Phospho- $\alpha$ -synuclein (pSyn) in green, Tyrosine Hydroxylase (TH) in magenta and respective merged images. (A) Young and (B) Adult brain areas, 1 m.p.i.. (C) Young and (D) Adult brain areas, 2 m.p.i.
